# Supplementary material for: Activation of Smad2 but not Smad3 is required to mediate TGF-β signaling during axolotl limb regeneration
Source: Oxford University Press journal article supplement (doi:10.1242/dev.131466), 2016-08-23
Supplement: dev131466supp.pdf [file dev131466supp.pdf]

## **Supplementary Materials and Methods:**

### Cloning of Axolotl Smad2, Smad3 and Smad7

Partial axolotl Smad2, Smad3 and Smad7 cDNA were obtained from axolotl larvae total RNA by RT-PCR. The cDNAs were amplified with primers (see sup. table1) designed from human cDNA sequences. The full length Smad2, Smad3 and partial Smad7 cDNA were subsequently obtained by screening an axolotl cDNA library (Stratagene, CA, USA), following the manufacturer's instructions and using the RT-PCR fragments as probes radioactively labeled with  $\alpha^{32}\text{P}$ -dCTP (Perkin Elmer, MA, USA).

### Acridine Orange / Ethidium bromide staining for apoptosis

AL-1 cells were electroporated (approx. 150k cells) with expression vectors (GFP with  $\beta$ -gal, axolotl Smad3 or axolotl Smad3  $\Delta$ D, see sup. table 3) and plated in a 12 well plate. Cells were harvested 48h post-electroporation and stained with Acridine Orange / Ethidium bromide as described in Ribble et al, 2005 and Kasibhatla et al, 2006 (Ribble et al., 2005; Kasibhatla et al., 2006).

### TUNEL assay

Following injection and electroporation of plasmids (details for in situ electroporation can be found in Guimond et al 2010)(Guimond et al., 2010), 10  $\mu\text{m}$  sections of paraffin embedded limbs were rehydrated then treated with Proteinase K 20 $\mu\text{g}/\text{ml}$  (Invitrogen, Ref#25530-015) for 20min at RT. Positive control were treated with DNase 1 1U/50 $\mu\text{L}$  (Invitrogen,

ref#18068-015) for 10min at RT. Sections were then rinsed in TBS then TdT buffer 1X (Invitrogen, ref#16314-015) and treated with recombinant terminal deoxynucleotidyl transferase (TdT) 3,75U/ $\mu$ L (Invitrogen, ref#10533-065), Digoxigenin-11-dUTP 2 $\mu$ M (Roche, ref#11093088910) in TdT buffer 1X for 1h at 37°C. Slides were rinsed in TBS then blocking was performed at RT for 15min with 2% sheep serum in TBS. Slides were incubated with a primary Antibody against digoxigenin 1/1500 (Roche, ref#113333062910) at 4°C overnight. Slides were rinsed (4X 15min) with PBST then incubated with a secondary antibody coupled to Alexa fluor 594 (anti-mouse 1/250) (Invitrogen, ref#A11020) in blocking solution for 2h at RT in the dark. Slides were rinsed (4X15min) with PBST and mounted with ProLong® Gold antifade reagent containing DAPI (Invitrogen, ref#36931). Slides were visualized with a Zeiss Axio Imager M2 Optical Microscope and composite images were generated (Zeiss, Munich, Germany).

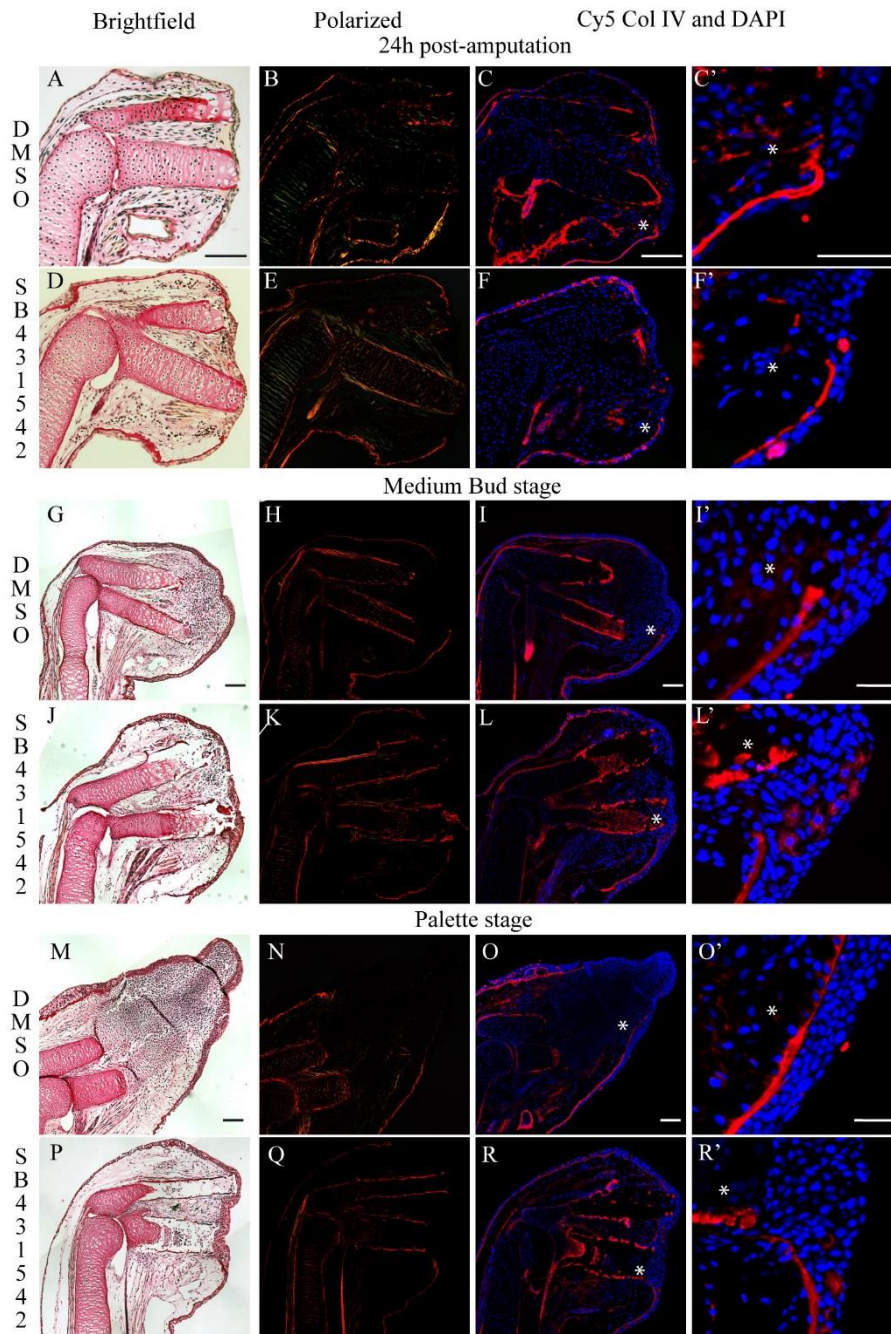

Supplementary Figure 1: **SB-431542 does not affect basement membrane reformation in regenerating limbs**

(A-C, G-I, M-O) Animals treated with DMSO (A,G,M) Brightfield view of limb indicates that a blastema is forming normally. Polarized light show some collagen deposition in Palette stage (N) in basement membrane region but not at 24h (B) or MB stage (H). Col IV expression (red) shows some collagen deposition in Palette stage (O,O') in basement membrane region but not at 24h (C, C') or MB stage (I,I'). (D-F, J-L, P-R) Animals treated with 25 $\mu$ M SB-431542 (D,J,P) Brightfield view of limb indicates that no blastema is forming. Polarized light show some collagen deposition in Palette stage (Q) in basement membrane region but not at 24h (E) or MB stage (K). Col IV expression (red) shows some collagen deposition in Palette stage (R,R') in basement membrane region but not at 24h (F, F') or MB stage (L,L'). Results show that basement membrane is not restored prematurely in limbs treated with SB-431542. Scale bar 200 $\mu$ m (A,C,G,I,M,O) and 60 $\mu$ m (C',I',O'). Composite images are shown and stars indicate areas of magnification.

```

      K19/K20                                K39
1  MSSILPFTPPVVKRLLGW KKSAGGSGGAGGGEQNGQEE KWCEKAV Smad2 Human
1  MSSILPFTPPVVKRLLGW KKSASGSGGAGGGEQNGQEE KWCEKAV Smad2 Axolotl

46 KSLVKKLKKKTG RLDLELEKAITTTQNCNTKCVTIPSTCSEIWGLSTP Smad2 Human
46 KSLVKKLKKKTG QLDLELEKAITTTQNCNTKCVTIPSTCSEIWGLSTP Smad2 Axolotl

91 NTIDQWDTTGLYSFSEQTRSLDGRLLQVSHRKGLPHVIYCRLWRWP Smad2 Human
91 NTIDQWDTTGLYSFSEQTRSLDGRLLQVSHRKGLPHVIYCRLWRWP Smad2 Axolotl

136 DLHSHHELKAIENCEYAFNLKKDEVCVNPHYHYQRVETPVLPPVLV Smad2 Human
136 DLHSHHELKAIENCEYAFNLKKDEVCVNPHYHYQRVETPVLPPVLV Smad2 Axolotl

181 PRHTEILTELPPLDDYTHSIPENTNFPAGIEPQSNIYIPETPPPGY Smad2 Human
181 PRHTEILTELPPLDDYTHSIPENTNFPAGIEPQSNIYIPETPPPGY Smad2 Axolotl

      T220                                S245/S250/S255
226 ISEGETSDQQLNQSMDTG SPAELSPTTLSPVNHSLDLQPVTYSE Smad2 Human
226 ISEGETSDQQLNQSMDTG SPAELSPSTLSPVNHSLDLQPVTYSE Smad2 Axolotl

271 PAFWCSIAYYELNQRVGETFHASQPSTVDGFTDPSNSERFCLGL Smad2 Human
271 PAFWCSIAYYELNQRVGETFHASQPSTVDGFTDPSNSERFCLGL Smad2 Axolotl

316 LSNVNRNATVEMTRRHIGRGVRLYYIGGEVFAECLSDSAIFVQSP Smad2 Human
316 LSNVNRNATVEMTRRHIGRGVRLYYIGGEVFAECLSDSAIFVQSP Smad2 Axolotl

361 NCNQRYGWHPATVCKIPPGCNLKIFNNQEFALLAQSVNQGF EAV Smad2 Human
361 NCNQRYGWHPATVCKIPPGCNLKIFNNQEFALLAQSVNQGF EAV Smad2 Axolotl

406 YQLTRMCTIRMSFVKGWGAEYRRQTVTSTPCWIELHLNGPLQWLD Smad2 Human
406 YQLTRMCTIRMSFVKGWGAEYRRQTVTSTPCWIELHLNGPLQWLD Smad2 Axolotl

      S465/S267
451 KVLTMGSPSVRCS SMS Smad2 Human
451 KVLTMGSPSVRCS SMS Smad2 Axolotl

```

Supplementary Figure 2: **Protein alignment of Smad2**

Protein sequences for human and axolotl Smad2 were aligned using DNASTAR MegAlign. Sequences are greatly conserved between species. The axolotl Smad2 sequence has 99% identity with the human Smad2. MH1 domain is underlined in green. MH2 domain is underlined in blue. Linker domain is located between MH1 and MH2 domain, with no underlining. Important post-translational modification sites are indicated on top of the aligned sequences and highlighted in green. Differences in aa are highlighted in yellow with red writing. All post-translational modification sites are conserved between both species.

```

1 MS SILPFTPPIVKRLLGWKKG EQN - - - - GQEEKW CEKAVKSLV Smad3 Human
1 MS SILPFTPPIVKRLLGWKKG GGGDQGGPG GQEEKW SEKAVKSLV Smad3 Axolotl

40 KKLKK TGQL DELE KAIT TQ NVNTKCITIPRSLDGRLQVSHRKGLP Smad3 Human
45 KKLKK SGQL EELE RAIT SQ SPGTKCITIPRSLDGRLQVSHRKGLP Smad3 Axolotl

85 HVIYCRLWRWPDHLHSHHELRA MELCE FAFNMKKDEVCVNPHYQR Smad3 Human
90 HVIYCRLWRWPDHLHSHHELRA VELCE YAFNMKKDEVCVNPHYQR Smad3 Axolotl

130 VETPVLPPVLVPRHTEIPAEFPPLDDYSHSIPENTNFPAGIEPQS Smad3 Human
135 VETPVLPPVLVPRHTEIPAEFPPLDDYSHSIPENTNFPAGIEPQS Smad3 Axolotl

      T179                               S204/S208/S213
175 N IPE TPPPGYLSEGETSDH QMNHSMD AG SPN LSPN PM SPA HNN Smad3 Human
180 N YPE TPPPGYLSEGETSDH LMNHSMD SG SPN VSPN SM SPI PNN Smad3 Axolotl

219 LDLQPVTYCEPAFWCSISYYELNQRVGETFHASQPSMTVDGFTDP Smad3 Human
225 LDLQPVTYCEPAFWCSISYYELNQRVGETFHASQPSMTVDGFTDP Smad3 Axolotl

264 SNSERFCLGLLSNVNRNAAVELTRRHIGRGVRLYYIGGEVFAECL Smad3 Human
270 SNSERFCLGLLSNVNRNAAVELTRRHIGRGVRLYYIGGEVFAECL Smad3 Axolotl

      K333
309 SDSAIFVQSPNCNQRYGWHPATVC KIPPGCNLKIFNNQEFAALL A Smad3 Human
315 SDSAIFVQSPNCNQRYGWHPATVC KIPPGCNLKIFNNQEFAALL S Smad3 Axolotl

      K378
354 QSVNQGFEAVYQLTRMCTIRMSFV KGWGAEYRRQTVTSTPCWIEL Smad3 Human
360 QSVNQGFEAVYQLTRMCTIRMSFV KGWGAEYRRQTVTSTPCWIEL Smad3 Axolotl

      S423/S425
399 HLNGPLQWLDKVLTMG SPS IRCS SV S Smad3 Human
405 HLNGPLQWLDKVLTMG TPS LRCS SV S Smad3 Axolotl

```

Supplementary Figure 3: **Protein alignment of Smad3**

Protein sequences for human and axolotl Smad3 were aligned using DNASTAR MegAlign. Sequences are greatly conserved between species. The axolotl Smad3 sequence has 93% identity with the human Smad3. MH1 domain is underlined in green. MH2 domain is underlined in blue. Linker domain is located between MH1 and MH2 domain, with no underlining. Important post-translational modification sites are indicated on top of the aligned sequences and highlighted in green. Differences in aa are highlighted in yellow with red writing. All post-translational modification sites are conserved between both species.

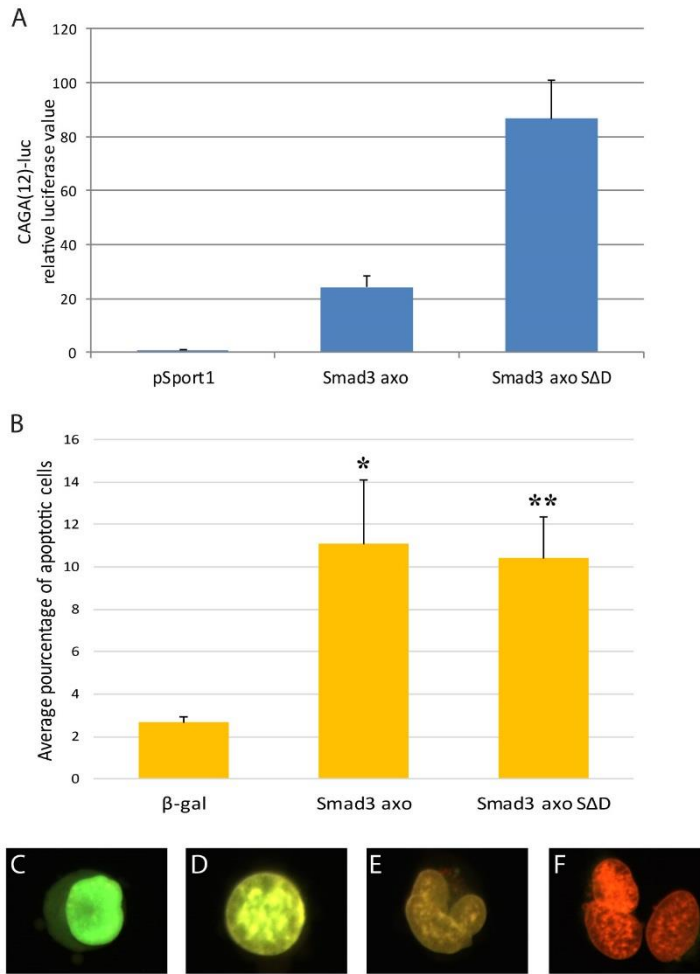

Supplementary Figure 4: **Overexpression of axolotl Smad3 leads to increased apoptosis in AL-1 cell line**

(**A**) Luciferase assay showing that axolotl Smad3 (Smad3 axo) and axolotl Smad3 SΔD (Smad3 axo SΔD, a phosphomimetic Smad3) overexpression have more activity on the CAGA promoter driving luciferase in AL-1 cells than control vector (pSport1) (n=12). Data is presented as mean relative luciferase value ± SEM. (**B**) Acridine Orange/Ethidium Bromide double staining cell count for apoptosis; (**C**) viable cell (not counted), (**D**) early apoptosis (counted as apoptotic), (**E**) late apoptosis (counted as apoptotic) and (**F**) necrotic cells (not counted). Data is presented as mean percentage ± SEM. Student's t-test were performed to compare means. There is significantly more apoptosis in axolotl Smad3 and axolotl Smad3 SΔD compared to β-gal (\*\*p < 0.01, \* p < 0.05, n=3).

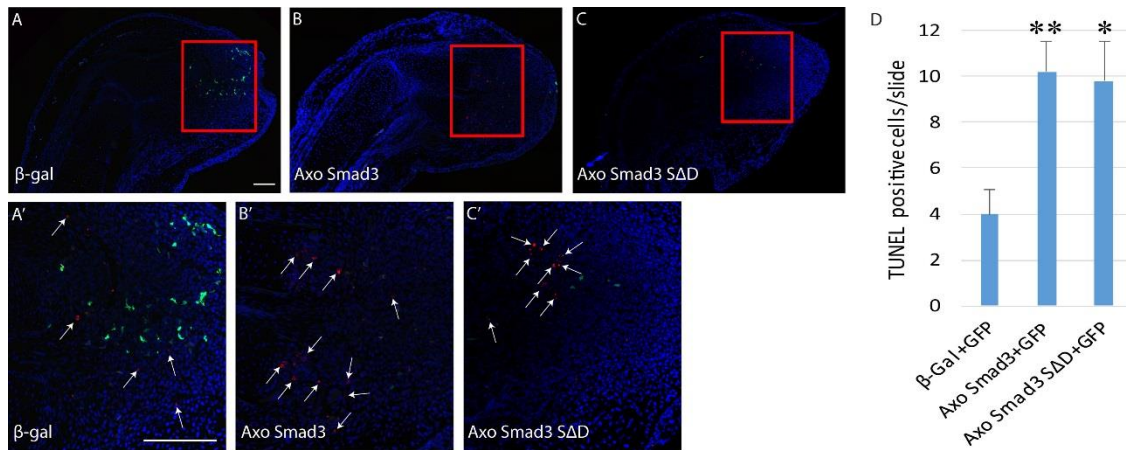

Supplementary Figure 5: **Overexpression of axolotl Smad3 in vivo leads to apoptosis**

(**A-A'**) Co-injection and electroporation of  $\beta$ -gal and GFP. Multiple fluorescent cells can be seen. Only a few cells are positive for apoptosis (TUNEL, 4 days post-transfection). (**B-B'**) Co-injection and electroporation of axolotl Smad3 and GFP. GFP positive cells are almost absent from slide. Multiple cells near the injection site are positive for apoptosis (TUNEL, 4 days post-transfection). (**C-C'**) Co-injection and electroporation of axolotl Smad3 S $\Delta$ D and GFP. Similar results to what is observed for axolotl Smad3 presented in B and B'; GFP positive cells are almost absent from slide. Multiple cells near the injection site are positive for apoptosis (TUNEL, 4 days post-transfection). Regions in red square are magnified (**A', B', C'**). TUNEL positive cells (red) are pointed with arrows. Composite images are shown and scale bars represent 200 $\mu$ m. (**D**) TUNEL positive cells were counted for each condition (n=5 different animals). Data is presented as number of positive cells  $\pm$  SEM. There are less apoptotic cells in  $\beta$ -gal and GFP co-injected blastemas compared to axolotl Smad3 and GFP or axolotl Smad3 S $\Delta$ D and GFP co-injected blastemas. Welch's t-test was performed to compare apoptosis between different treatments; observed difference are statistically significant. \*\* p < 0.01, \* p < 0.05.

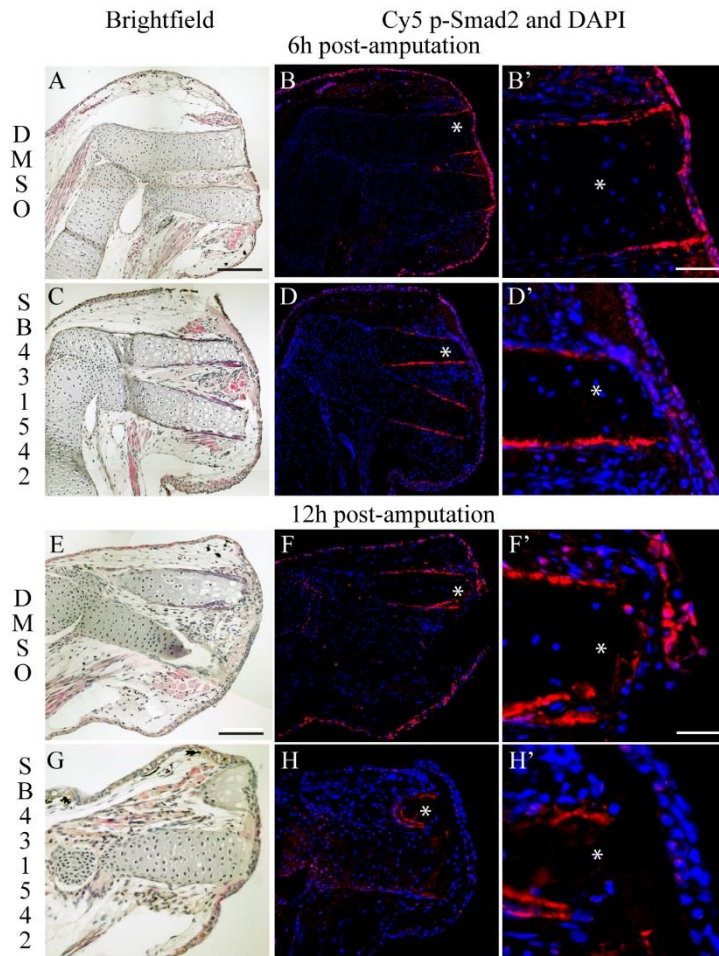

Supplementary Figure 6: **SB-431542 prevents phosphorylation of p-Smad2 in regenerating limbs**

Control animal treated with DMSO for 6h (A-B) or 12h (E-F). (A,E) Hematoxylin and Eosin staining shown in brightfield microscopy. Scale bar is 200 $\mu$ m. (B,F) Nuclei staining with DAPI (blue) overlaid with immunofluorescence of p-Smad2 (red) shows phosphorylation in most epithelial cells of the wound epithelium and some in the underlying mesenchymal cells. (B',F') Magnified view (Scale bar 50 $\mu$ m, composite images are shown and stars indicate area of magnification). Phosphorylated proteins are often in the nucleus. Animal treated with 25 $\mu$ M SB-431542 for 6h (C-D) or 12h (G-H). (C,G) Hematoxylin and Eosin staining shown in brightfield microscopy. (D-D', H-H') Overlay of DAPI and immunofluorescence of p-Smad2 shows very limited positive cells for phosphorylated Smad2 protein. Composite images are shown and stars indicate area of magnification.



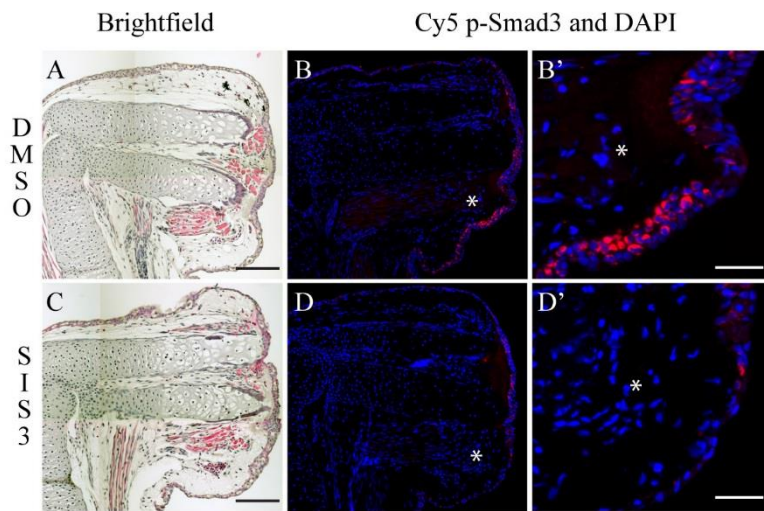

Supplementary Figure 7: **SIS3 treatment reduces phosphorylation of p-Smad3**

(A-B) Control animal treated for 3h with DMSO. (A) Hematoxylin and Eosin staining shown in brightfield microscopy. Scale bar is 300 $\mu$ m. (B) Overlay of nuclei staining with DAPI (blue) and immunofluorescence of p-Smad3 (red) shows phosphorylation in epithelial cells of the wound epithelium, especially near the plane of amputation. (B') Magnified view (scale bar is 60 $\mu$ m, composite images are shown and stars indicate area of magnification) shows that phosphorylated proteins are often in the nucleus (pink). (C-D) Animal treated for 3h with 5 $\mu$ M SIS3. (C) Hematoxylin and Eosin staining shown in brightfield microscopy. Scale bar is 300 $\mu$ m. (D-D') Overlay of nuclei staining with DAPI (blue) and immunofluorescence of p-Smad3 (red) shows reduced number of positive cells for phosphorylated Smad3 protein and (D') p-Smad3 signal is not localized in nucleus. Scale bar is 60 $\mu$ m. Composite images are shown and stars indicate area of magnification.

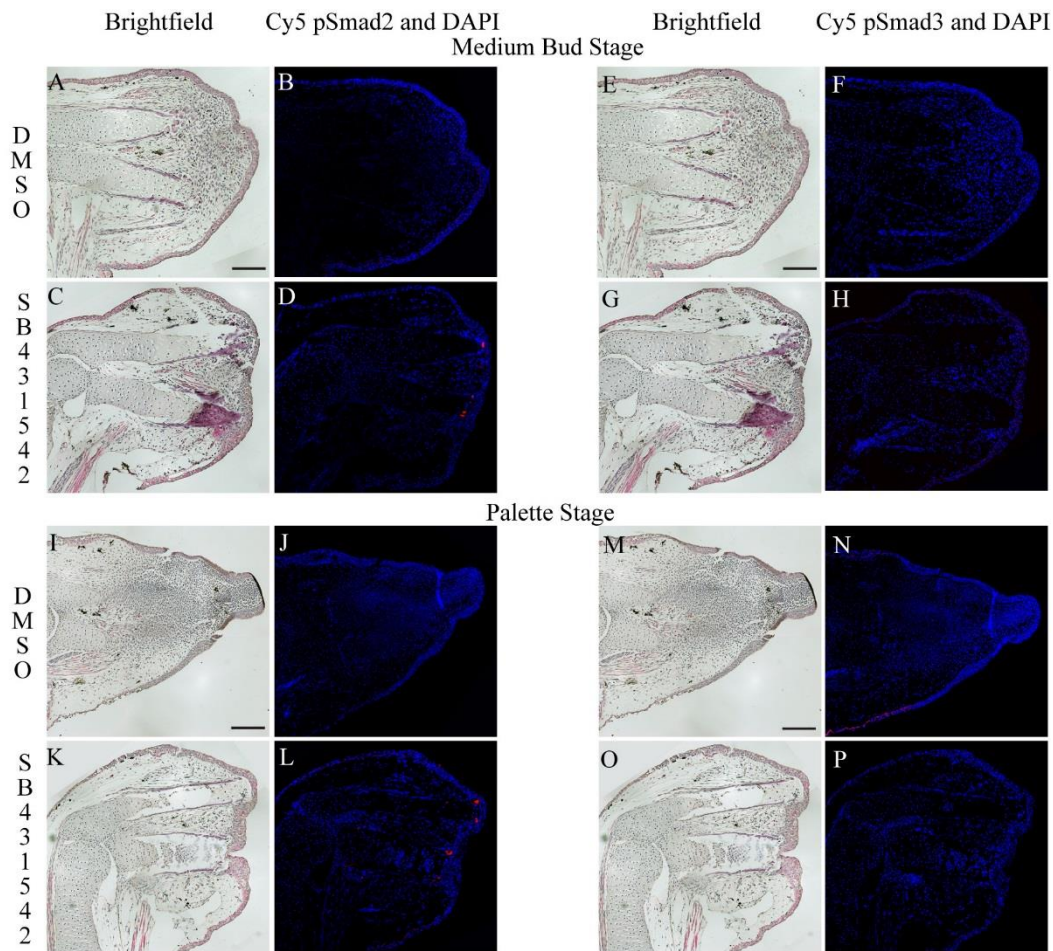

Supplementary Figure 8: **p-Smad2 and p-Smad3 are not detected at Medium Bud and Palette stages**

**Control animal treated with DMSO** until MB (**A-B, E-F**) or Pal (**I-J, M-N**). (**A, E, I, M**) Hematoxylin and Eosin staining shown in brightfield microscopy. Composite images are shown and scale bars are 200 $\mu$ m. (**B, F, J, N**) Nuclei staining with DAPI (blue) overlaid with immunofluorescence of p-Smad2 (**B, J**) or p-Smad3 (**F, N**) shows no phosphorylation. **Animal treated with 25 $\mu$ M SB-431542** until MB (**C-D, K-L**) or Pal (**G-H, O-P**). (**C, G, K, O**) Hematoxylin and Eosin staining shown in brightfield microscopy. (**D, H, L, P**) Overlay of DAPI and immunofluorescence shows no positive cells for phosphorylated proteins.

Supplementary Table 1: List of primers

| Gene Name                      |                        | Primer sequence 5' to 3' |
|--------------------------------|------------------------|--------------------------|
| Smad3 probe primers            | 3RSmd3-11<br>(forward) | AATCAGGGTTTCGAAGCCGT     |
|                                | 5RSmd3-5 (reverse)     | CTGATTTACAGATTGGGACAA    |
| Axolotl Smad2 (used for probe) | aSmd2F59               | ATTCAGAACCAGCGTTTTGG     |
|                                | aSmd2R598              | ATTGCAGAGGTCCATTCAGG     |
| Axolotl Smad3                  | Smad3_axo_F515         | GGAGCTCTGCGAGTATGCCT     |
|                                | Smad3_axo_R997         | CTCTCCCACTCGTTGATTAAGC   |
| Axolotl Smad7 (used for probe) | aSmd7F95               | GCCTTCCTCCACTGAAACTG     |
|                                | aSmd7R445              | GTGGCCGACTTGATGAAAAT     |
| Axolotl MMP2                   | aMMP2F100              | TCAGAAGGCTCTCCCTGTGT     |
|                                | aMMP2R779              | GCTGCATCCACATGTTTCAC     |
| Axolotl MMP9                   | F485_MMP9axo           | AAGGGGGCTTGCAGGATAA      |
|                                | R1091_MMP9axo          | AGCACAGAAGTGTGGGCTCT     |
| Axolotl MMP13                  | F2381_MMP13axo         | AAAACGACGCTCCAAAACAC     |
|                                | R2565_MMP13axo         | AAGGCACACTCTCAGCCAAA     |
| Axolotl MMP14                  | F2795_MMP14axo         | TGGATAACTGAATGTGCGGA     |
|                                | R3046_MMP14axo         | GACGCTGACACTCAACCTCA     |
| Axolotl GAPDH                  | aGAPDHF709             | AGCTCAATGGGAAACTCACTGGC  |
|                                | aGAPDHR966             | TCACAAAGTGATCGTTGAGGGCA  |

Supplementary Table 2: Antibodies and blotting conditions

| Antibody       | Manufacturer                     | Ref #   | Dilution | Conditions | Blocking                                     | ECL    |
|----------------|----------------------------------|---------|----------|------------|----------------------------------------------|--------|
| Smad2          | Cell Signaling                   | 5339    | 1/500    | O.N. 4°C   | 5% milk in PBST, 6h 4°C                      | GE*    |
| p-Smad2        | Cell Signaling                   | 3108    | 1/500    | O.N. 4°C   | 5% chicken serum, 0,75% BSA in TBST, 1h30 RT | LL+*** |
| Smad3          | Zymed                            | 51-1500 | 1/500    | O.N. 4°C   | 5% milk in PBST, 6h 4°C                      | GE*    |
| p-Smad3        | <i>See materials and methods</i> | N/A     | 1/2500   | O.N. 4°C   | 5% chicken serum, 0,75% BSA in TBST, 1h30 RT | SFE*** |
| TGF- $\beta$ 1 | Santa Cruz                       | Sc-146  | 1/500    | O.N. 4°C   | 5% chicken serum, 0,75% BSA in TBST, 1h30 RT | GE*    |
| GAPDH          | Sigma                            | G8795   | 1/1000   | 1h RT      | 5% chicken serum in PBST, 1h RT              | GE*    |

\*Western blotting detection reagents, GE Healthcare, ref#RPN2109, Buckinghamshire, UK

\*\*Lumi-Light<sup>Plus</sup> Western Blotting Substrate, Roche, ref#12015196001

\*\*\*SignalFire<sup>TM</sup> Elite ECL Reagent, Cell Signaling, ref#12757

Supplementary Table 3: Plasmids used in injection/electroporation experiment

| Gene expressed by plasmid with CMV promoter                         | Backbone | Quantity used ( $\mu$ g) |
|---------------------------------------------------------------------|----------|--------------------------|
| GFP                                                                 | Max GFP  | 0.5                      |
| $\beta$ -gal                                                        | pSport1  | 1                        |
| axolotl Smad3 (wild type)                                           | pSport1  | 1                        |
| Axolotl Smad3 $\Delta$ D (Serine 423-425 mutated to glutamic acids) | pSport1  | 1                        |

### Supplementary References:

**Guimond, J. C., Levesque, M., Michaud, P. L., Berdugo, J., Finnson, K., Philip, A. and Roy, S.** (2010). BMP-2 functions independently of SHH signaling and triggers cell condensation and apoptosis in regenerating axolotl limbs. *BMC Dev Biol* **10**, 15.

**Kasibhatla, S., Amarante-Mendes, G. P., Finucane, D., Brunner, T., Bossy-Wetzell, E. and Green, D. R.** (2006). Acridine Orange/Ethidium Bromide (AO/EB) Staining to Detect Apoptosis. *CSH Protoc* **2006**.

**Ribble, D., Goldstein, N. B., Norris, D. A. and Shellman, Y. G.** (2005). A simple technique for quantifying apoptosis in 96-well plates. *BMC Biotechnol* **5**, 12.
